# Supplementary material for: Novel agents that downregulate EGFR, HER2, and HER3 in parallel
Source: PubMed Central journal article supplement (PMC4496366; doi:10.18632/oncotarget.3398), 2015-03-19

SUPPLEMENTARY FIGURES

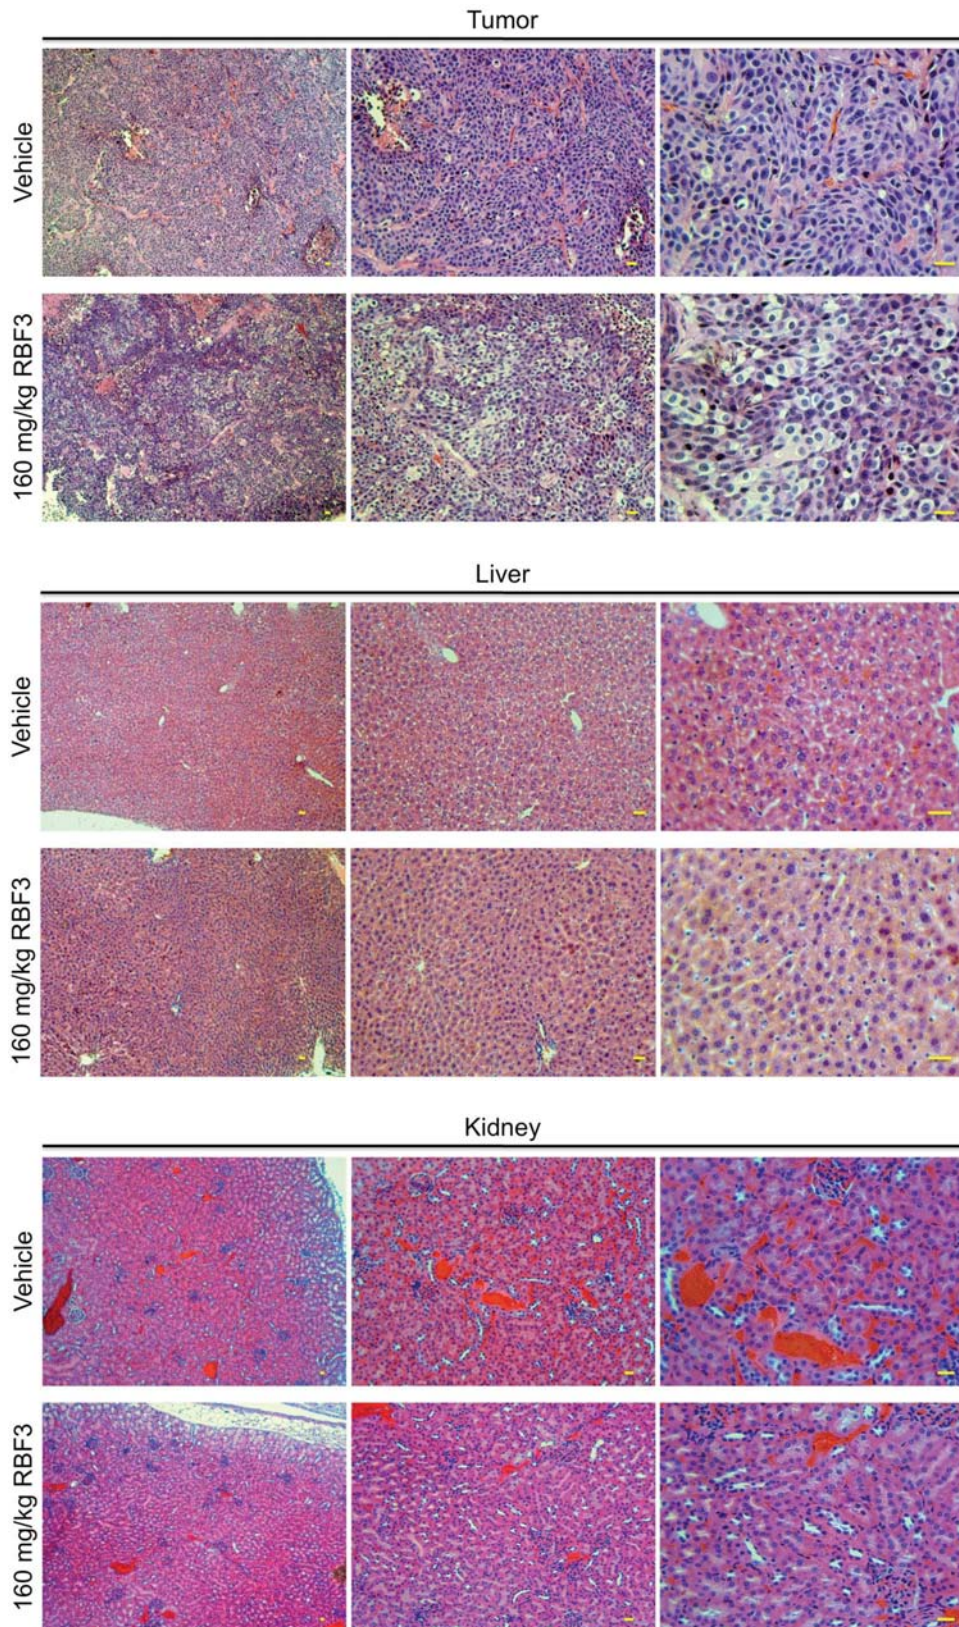

Supplementary Figure S1: RBF3 (160 mg/kg) induces a high frequency of cancer cell death without evidence of liver or kidney toxicity (Scale Bars = 20  $\mu$ m).

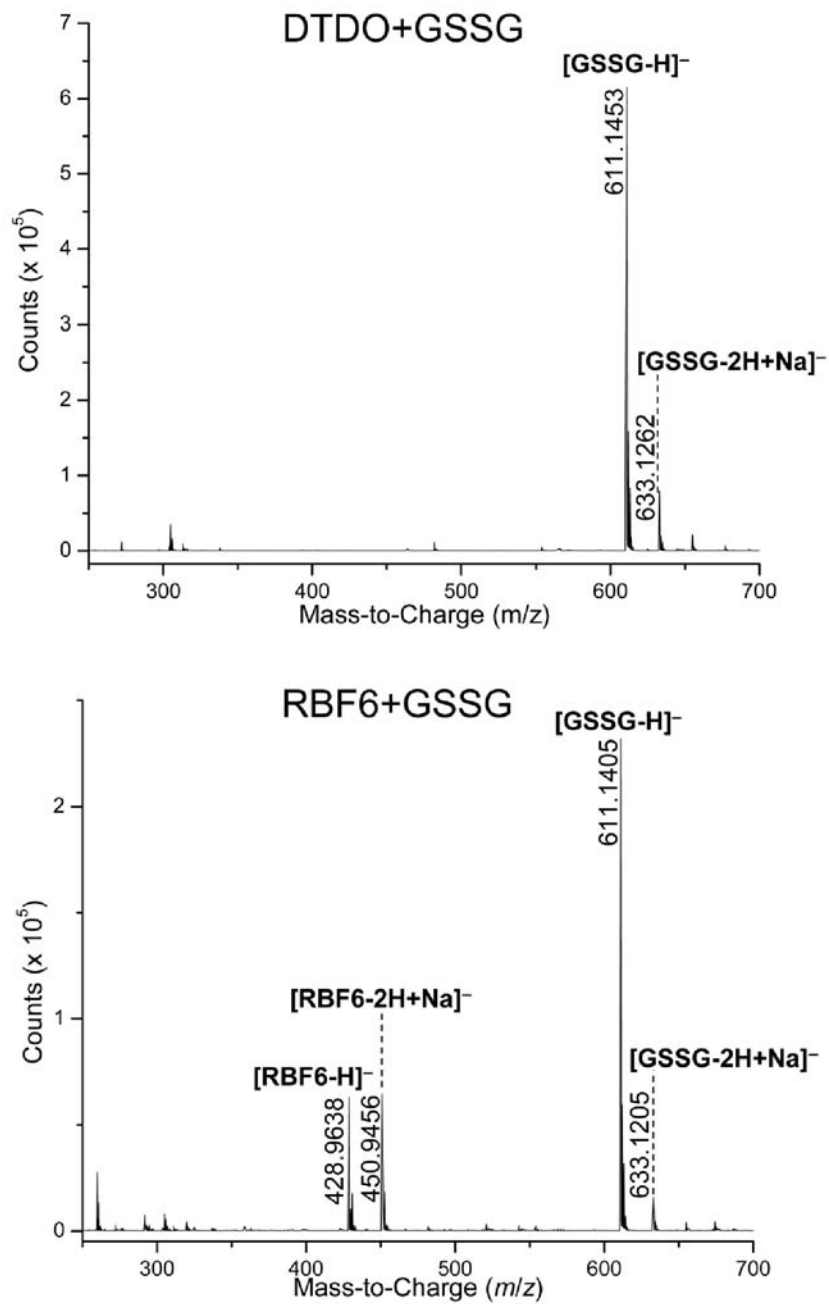

Supplementary Figure S2: Mass spectra of reactions carried out between 10 mM DTDO or 10 mM RBF6 with 10 mM oxidized glutathione (GSSG) for 24 hours at 37°C, pH 7.0.

Supplementary Figure S3: NMR spectra of the synthesized compounds.

**DTDO**

RBF128c-H  
RBF128c in CDCl<sub>3</sub> - dithiane dioxide

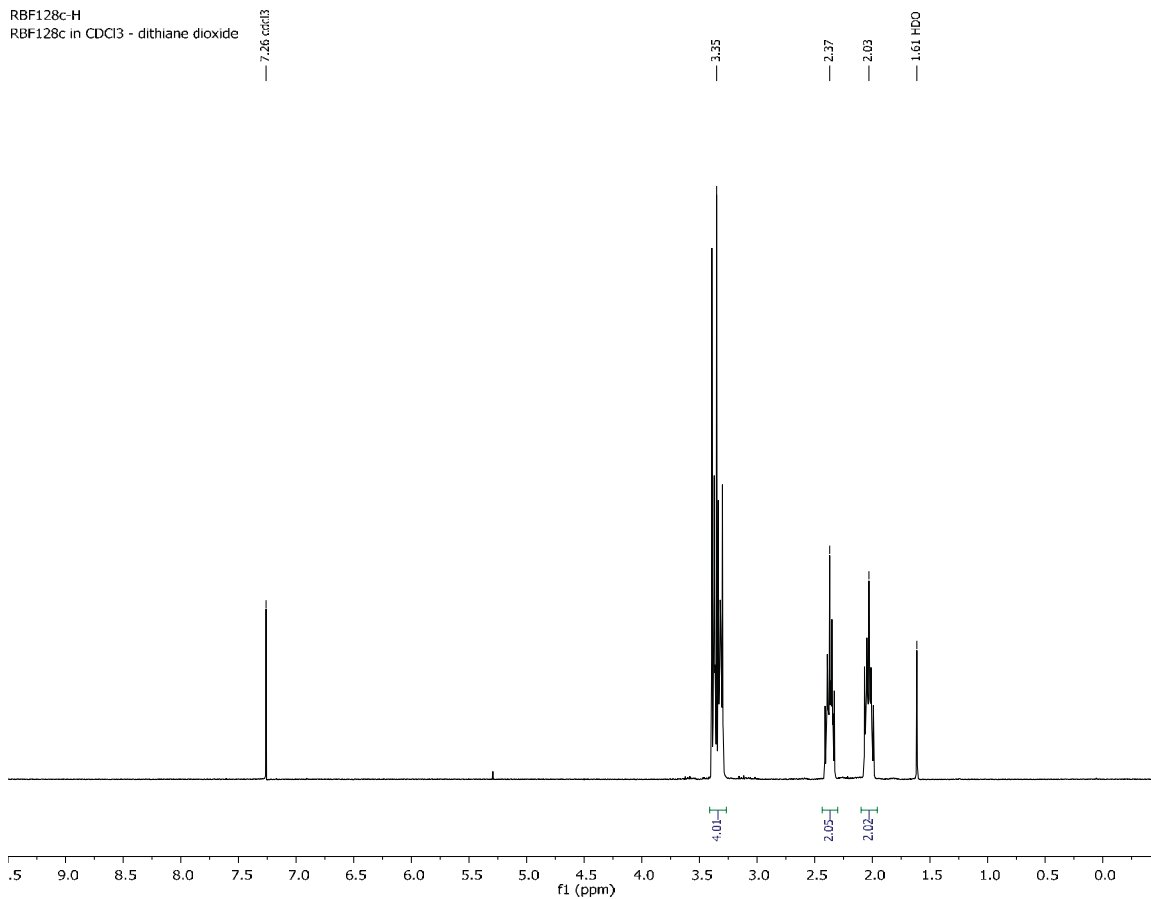

RBF128c-C  
RBF128c in CDCl<sub>3</sub> - dithiane dioxide

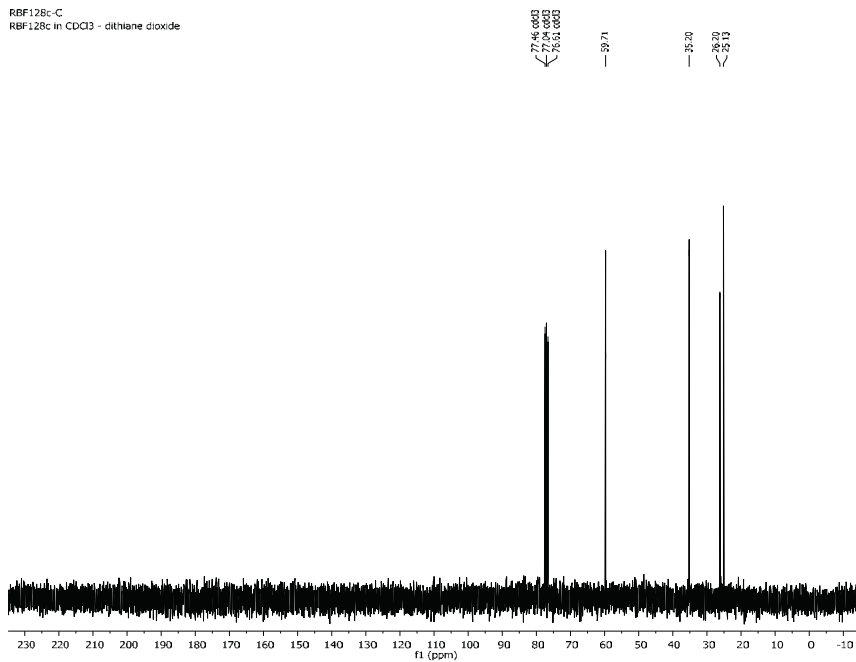

(Continued)

# RBF1

RBF135H  
RBF135 in D2O - RBF1 - just one recryst.

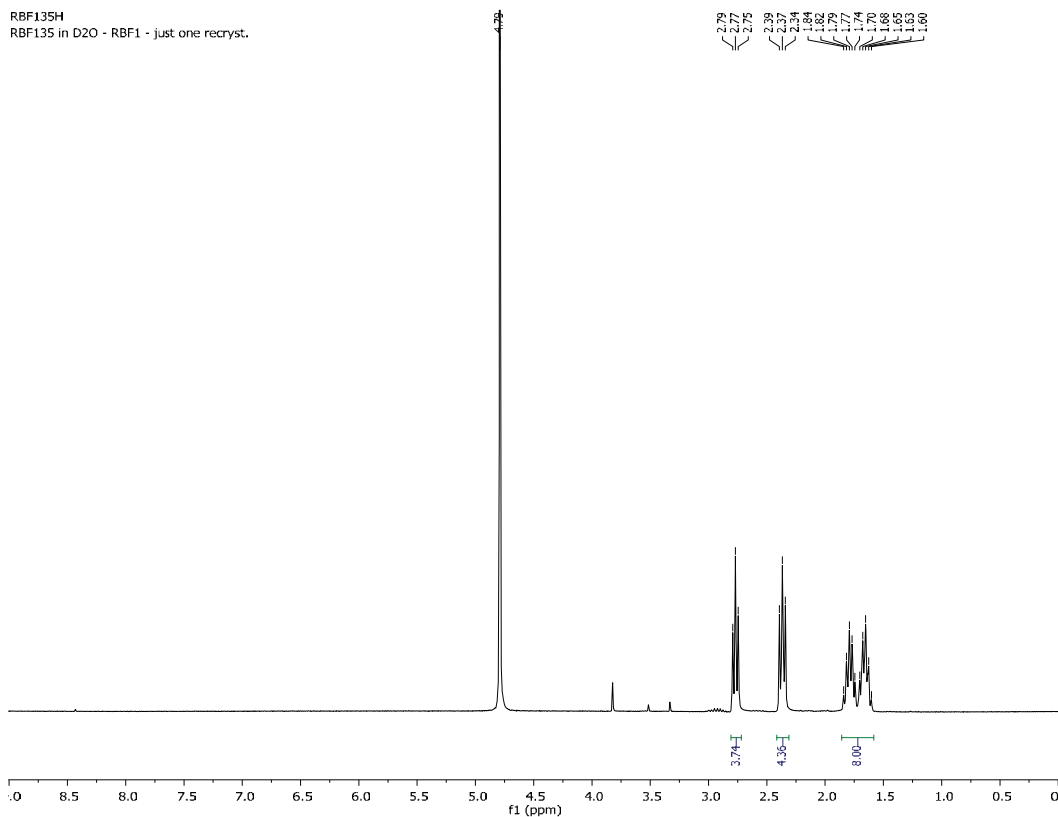

RBF1C  
RBF1 in D2O - washed with hot Me2CO, iPrOH and EtOH

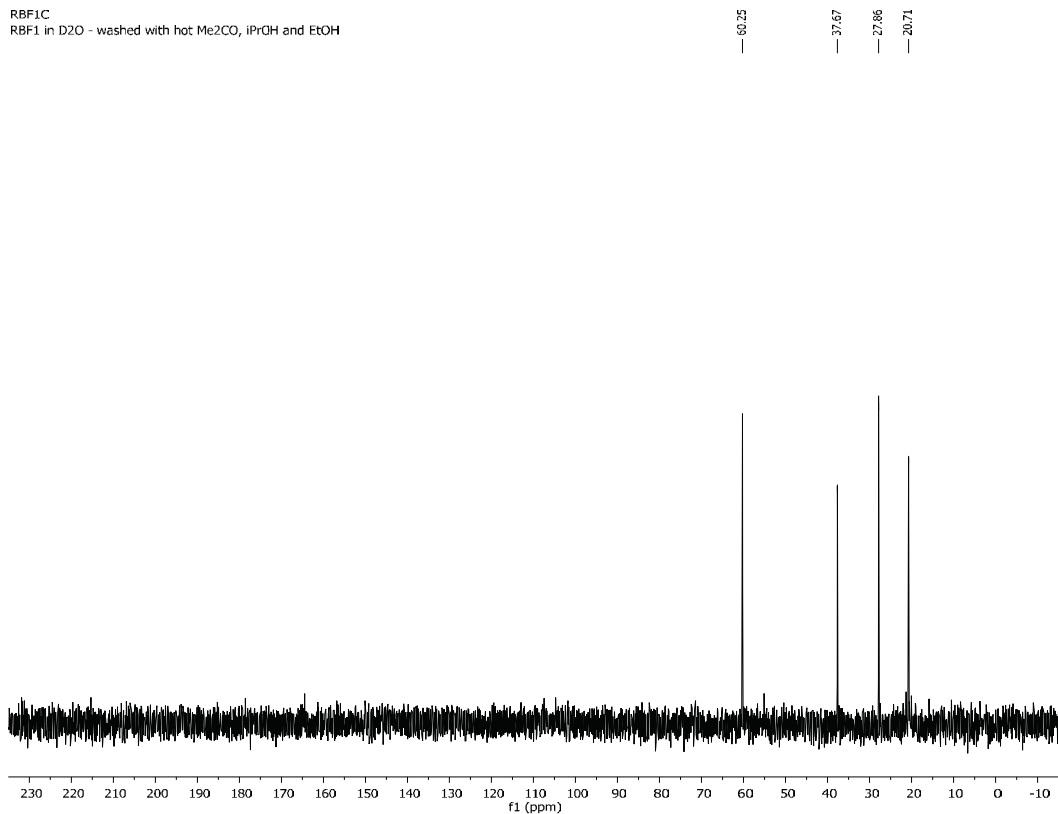

(Continued)

### RBF2

RBF2341VH  
RBF2341V in D2O - RBF2 - solid obtained washed twice with chloroform in sonicator

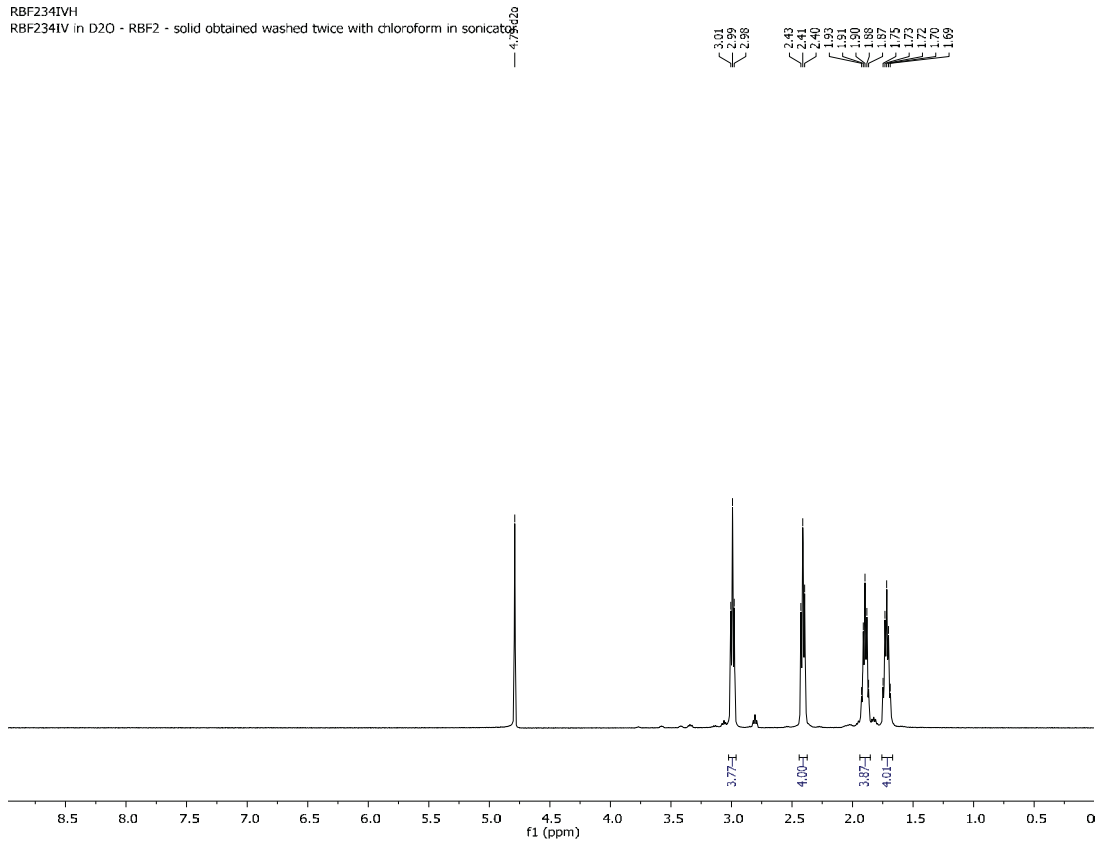

RBF2341VC  
RBF2341V in D2O - RBF2 - solid obtained washed twice with chloroform in sonicator

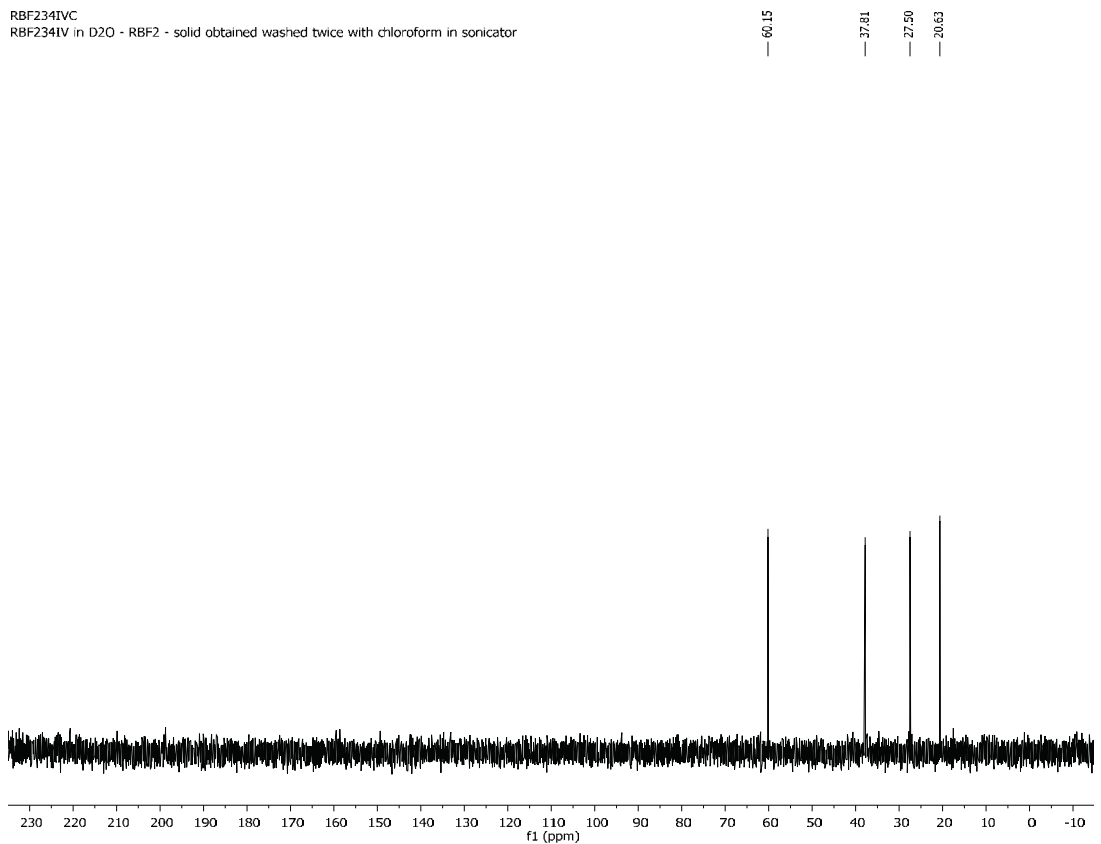

(Continued)

### RBF3

RBF3H  
RBF3 in D2O

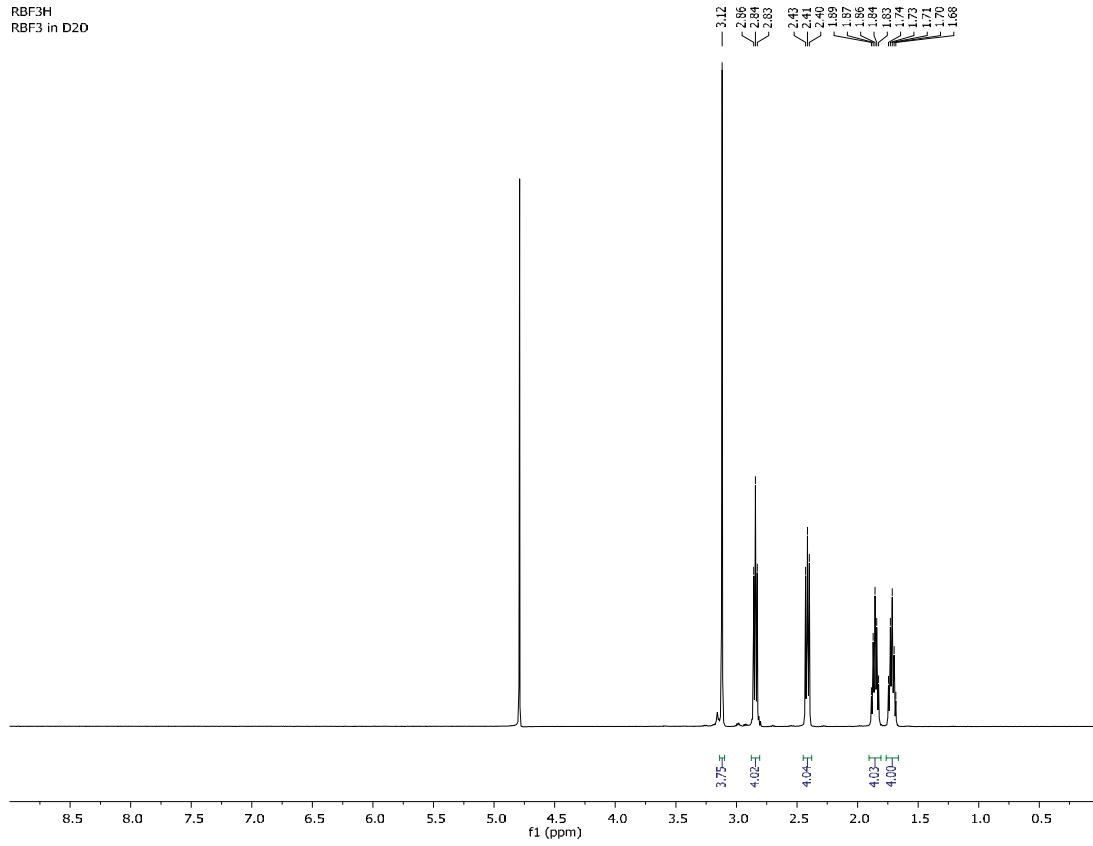

RBF3C  
RBF3 in D2O

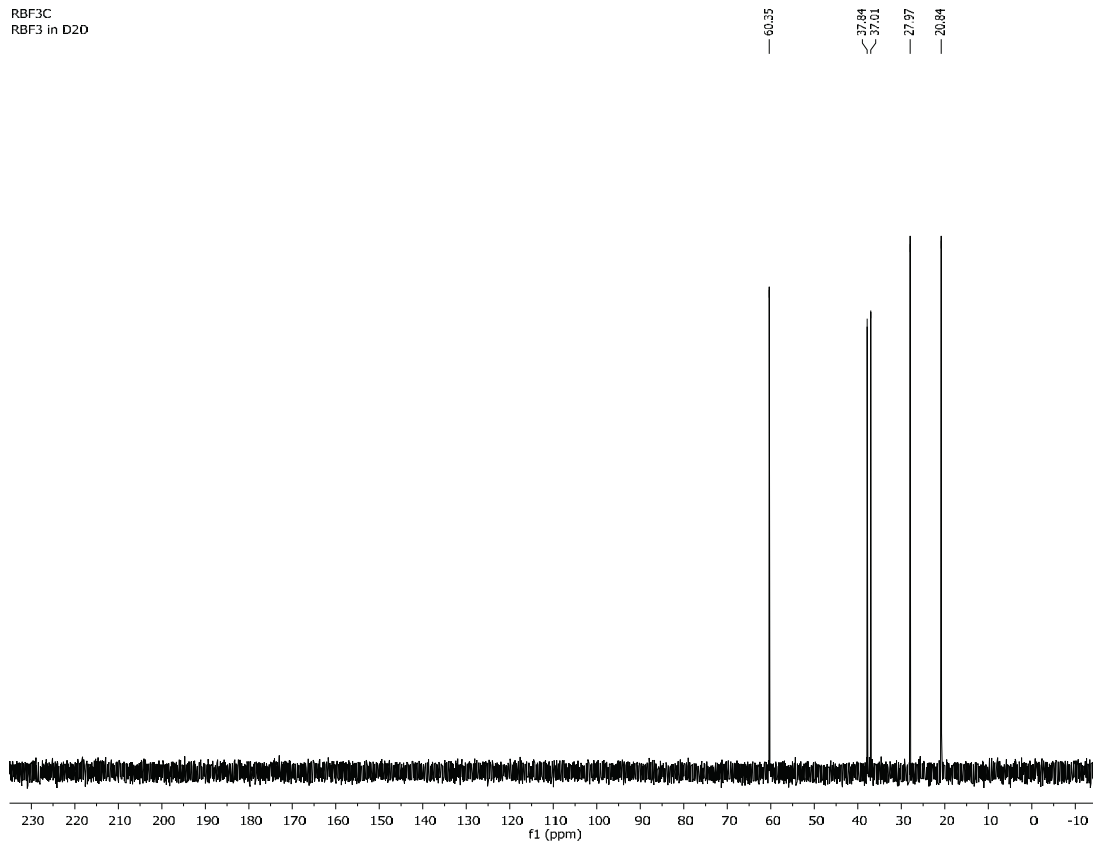

(Continued)

### Sodium butane-1,4-disulfinate

RBF140cH  
RBF140 in D2O - oxidation of RBF1 (RBF4)

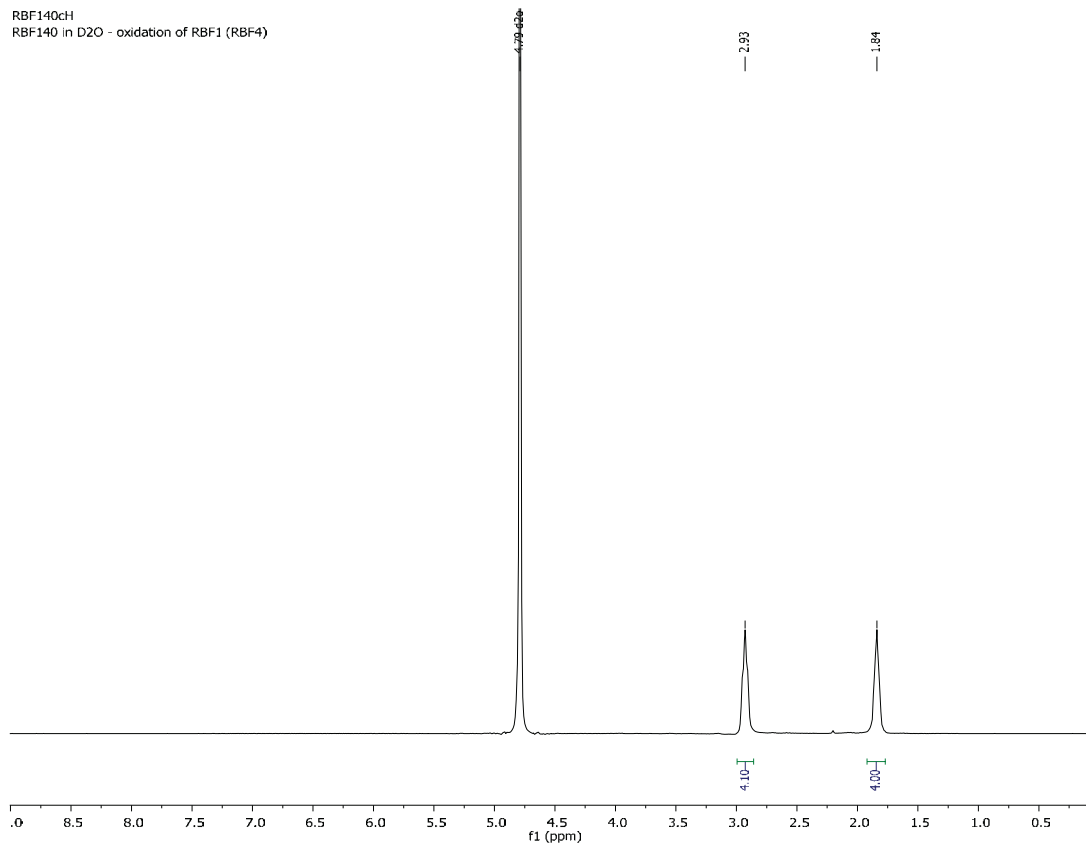

RBF140cC  
RBF140 in D2O - oxidation of RBF1 (RBF4)

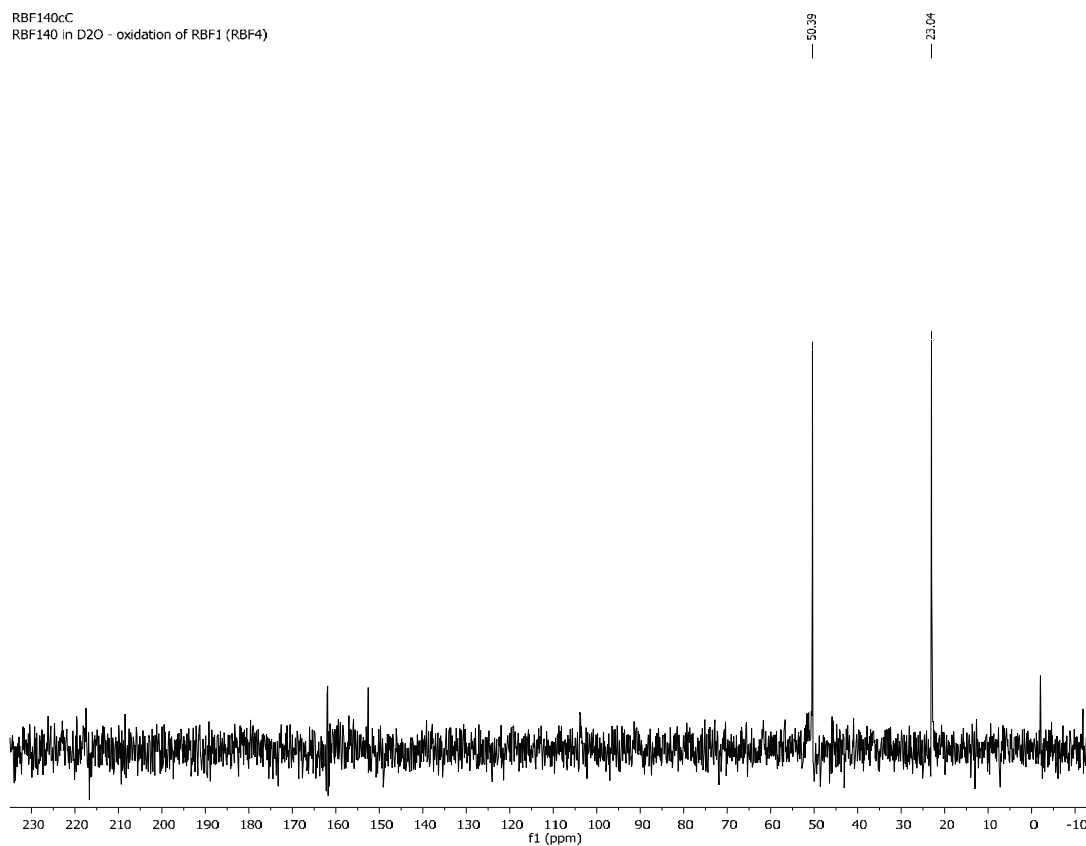

(Continued)

### Sodium butane-1,4-disulfinate

RBF140cH  
RBF140 in D2O - oxidation of RBF1 (RBF4)

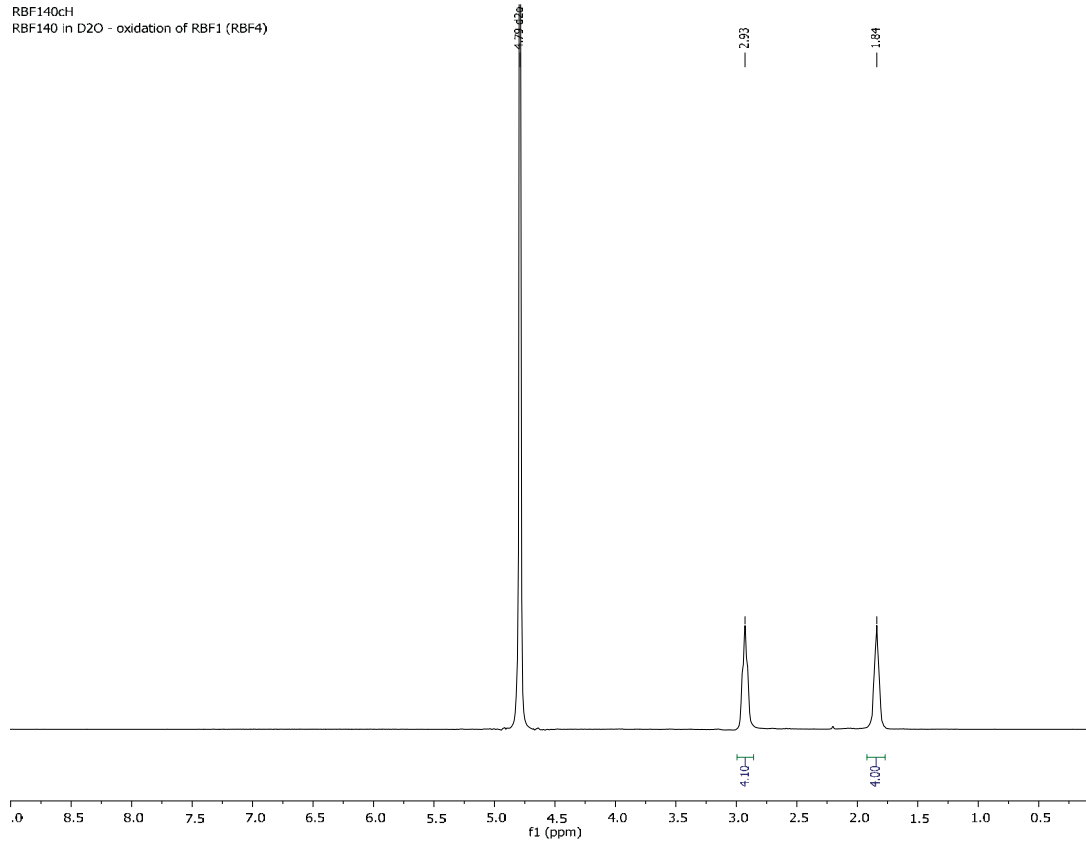

RBF140cC  
RBF140 in D2O - oxidation of RBF1 (RBF4)

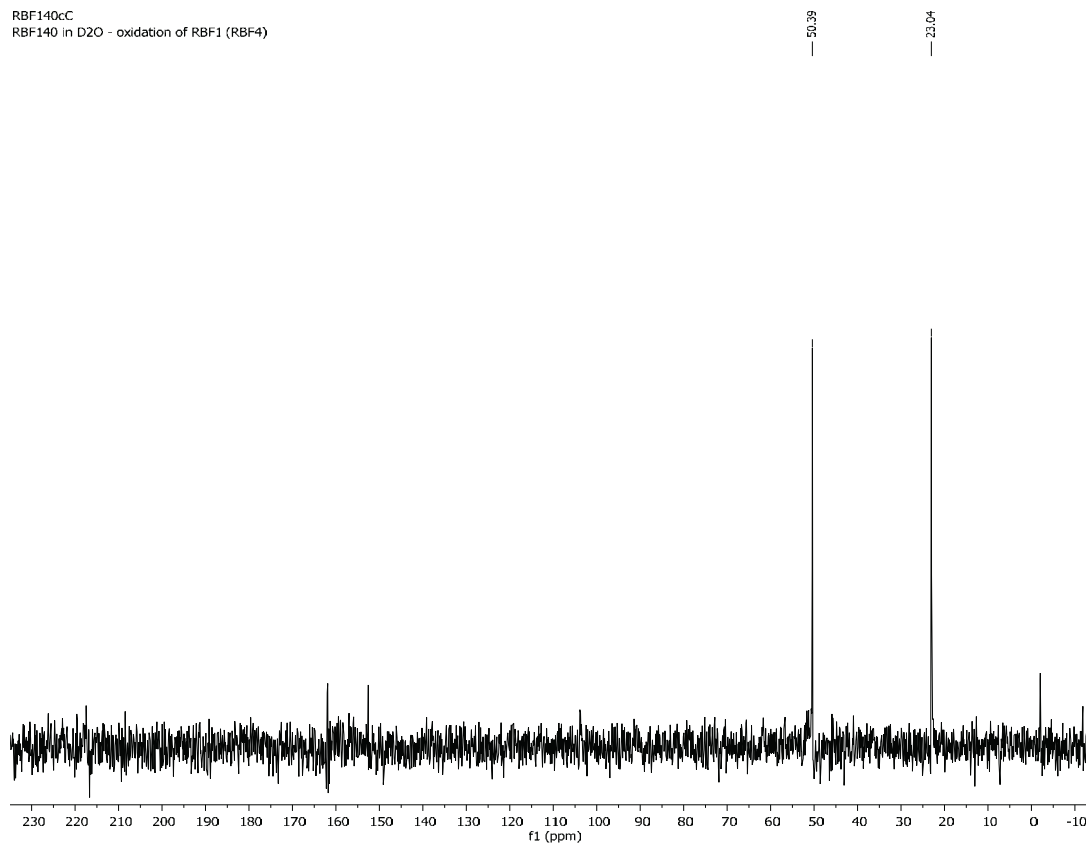

(Continued)



### RBF4

RBF145p3H  
RBF145p3 in D2O - RBF4 - washed with hot Me2CO, iPrOH and EtOH

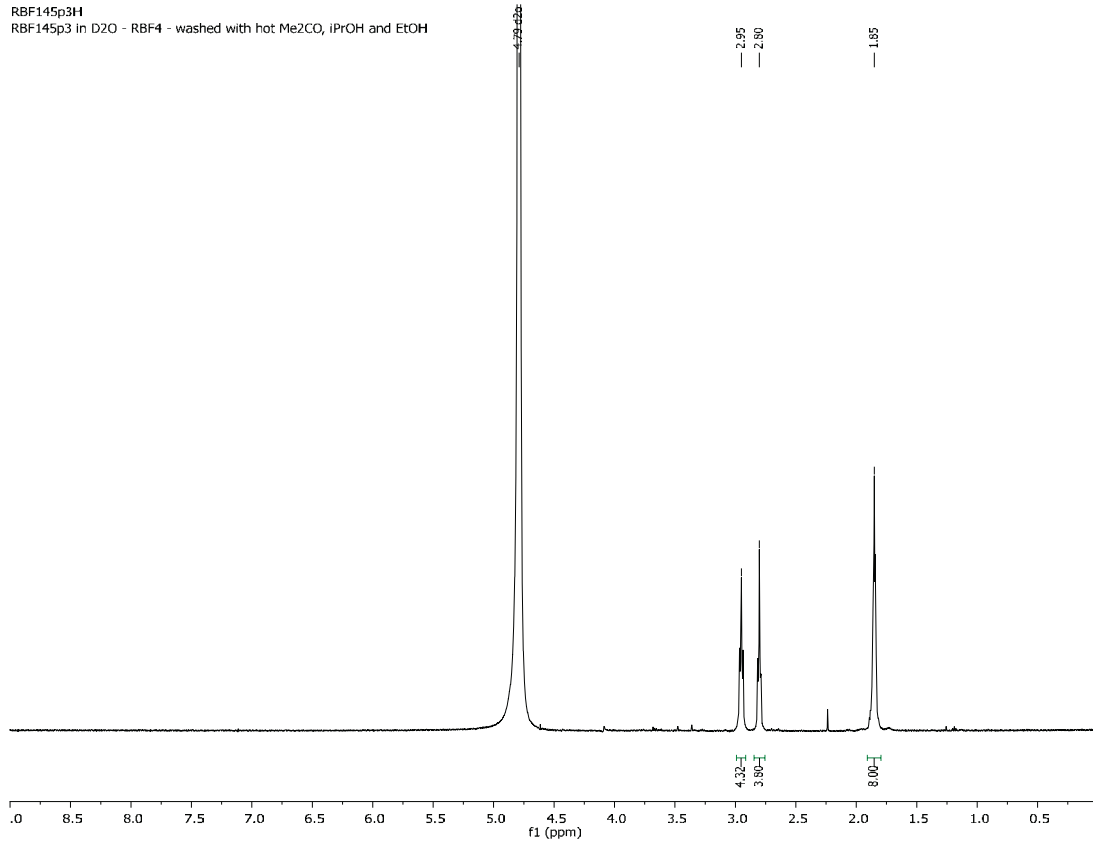

RBF145fC  
RBF145f in D2O - oxidation RBF1 (0 min)

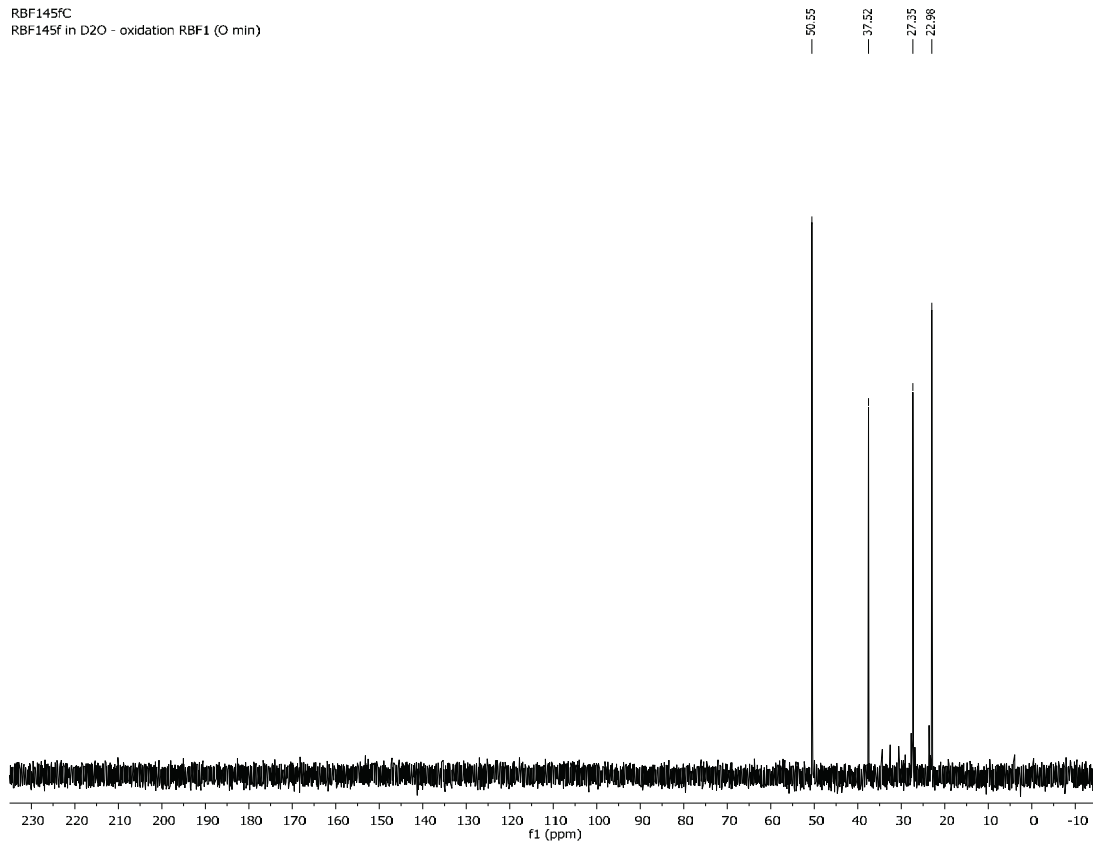

(Continued)

### RBF6

RBF151p2H  
RBF151p2 in D2O - RBF6 - washed with hot Me2CO, iPrOH and EtOH

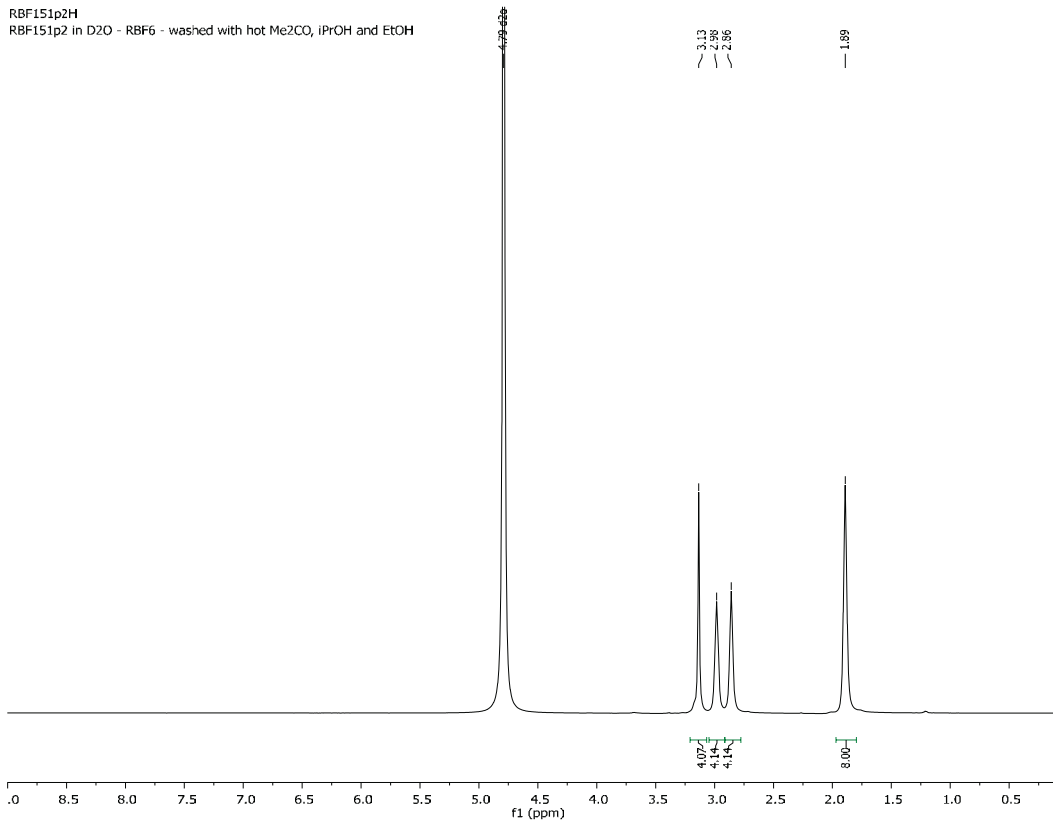

RBF151p2C  
RBF151p2 in D2O - RBF6 - washed with hot Me2CO, iPrOH and EtOH

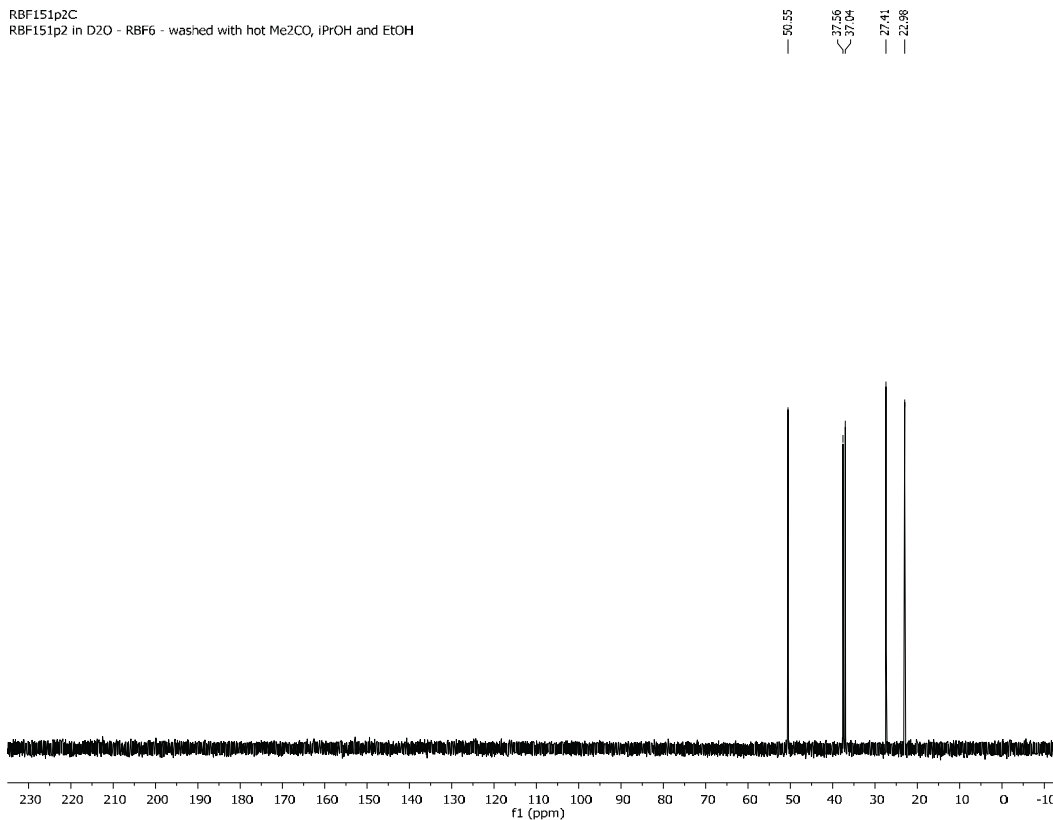

Supplement: oncotarget-06-10445-s001.pdf [file oncotarget-06-10445-s001.pdf]
